# Supplementary material for: Genetic landscape of long noncoding RNA (lncRNAs) in glioblastoma: identification of complex lncRNA regulatory networks and clinically relevant lncRNAs in glioblastoma
Source: PubMed Central journal article supplement (PMC6049862; doi:10.18632/oncotarget.25434), 2018-07-03
Supplement: oncotarget-09-29548-s001.pdf [file oncotarget-09-29548-s001.pdf]

# Genetic landscape of long noncoding RNA (lncRNAs) in glioblastoma: identification of complex lncRNA regulatory networks and clinically relevant lncRNAs in glioblastoma

## SUPPLEMENTARY MATERIALS

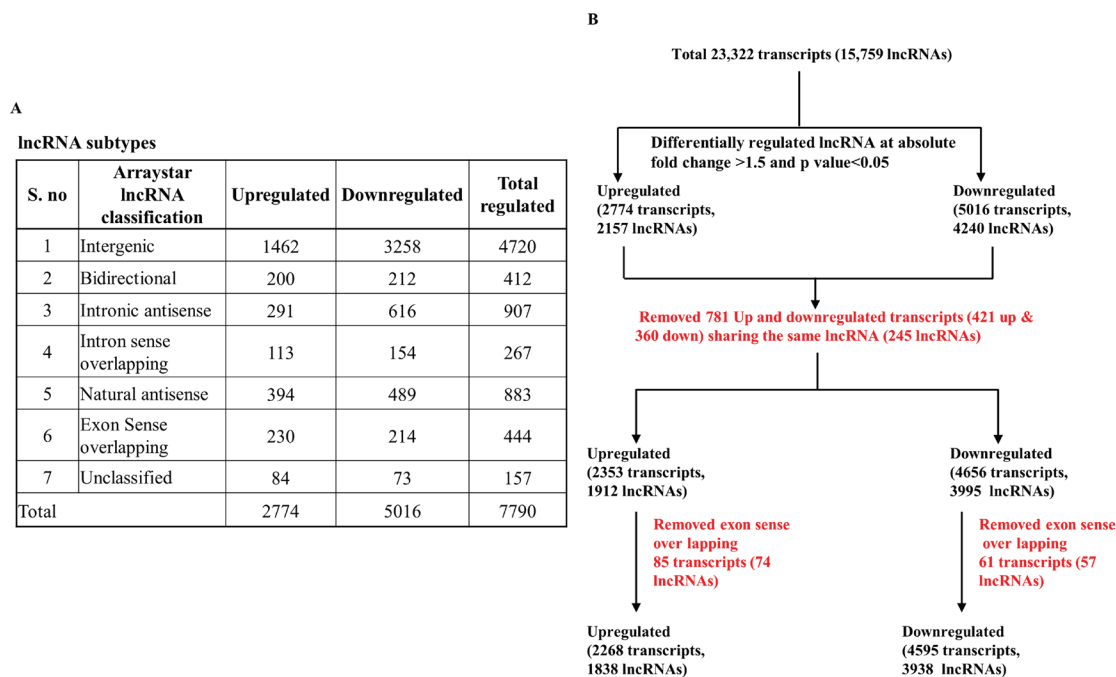

**Supplementary Figure 1: Filtering of lncRNAs for further analysis.** (A) Tabular representation of differentially regulated different types of lncRNA in our GBM cohort as compared to control brain samples. (B) Flow chart depicting the strategy employed to filter out lncRNA transcripts. The transcripts of a gene that showed both upregulation and downregulation and exon sense overlapping transcripts were filtered out.

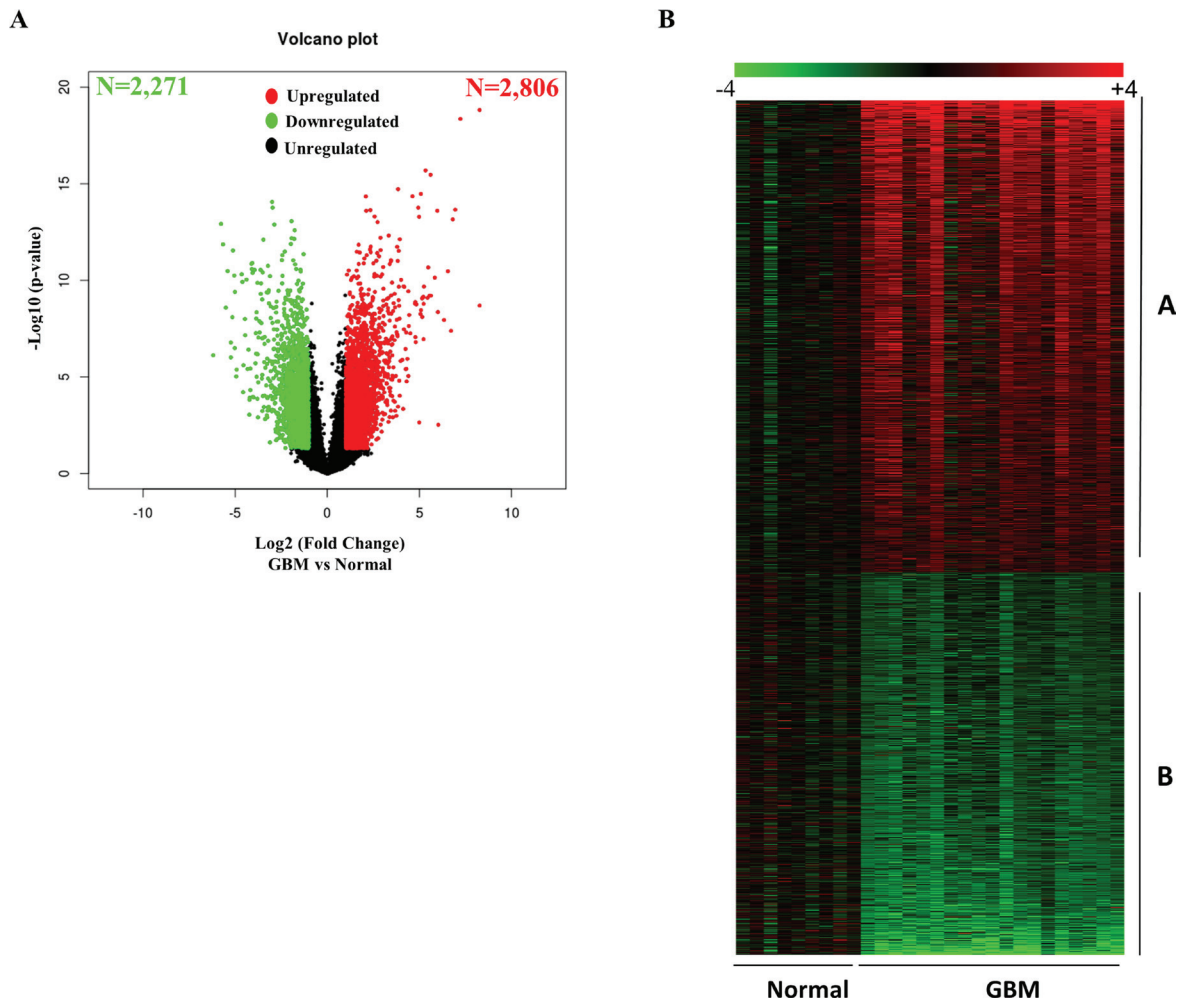

**Supplementary Figure 2: mRNA profiling in GBM samples.** Dysregulated mRNAs were profiled in the same samples that were subjected to lncRNA microarray analysis. Out of 23,376 mRNA transcripts profiled, 2,806 were upregulated and 2,271 were downregulated in GBM tissues as compared to control brain tissue. **(A)** Volcano plot depicting the dysregulated mRNAs, with the red dots as upregulated mRNAs and green dots as downregulated transcripts. **(B)** Heat map of dysregulated mRNAs in GBM tissue over control brain tissue. Upregulated transcripts are denoted in red and downregulated in green.

### lncRNA - mRNA correlation

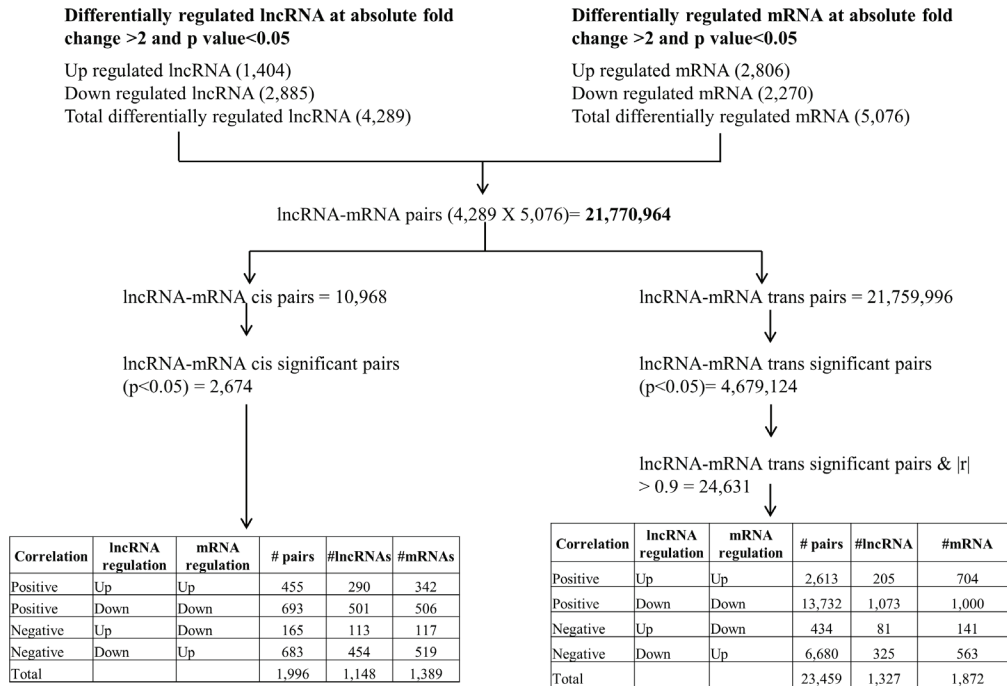

**Supplementary Figure 3: Correlation of lncRNAs with mRNAs.** A flow chart showing the strategy used for correlating lncRNAs with mRNAs in our cohort.

### lncRNA - lncRNA correlation

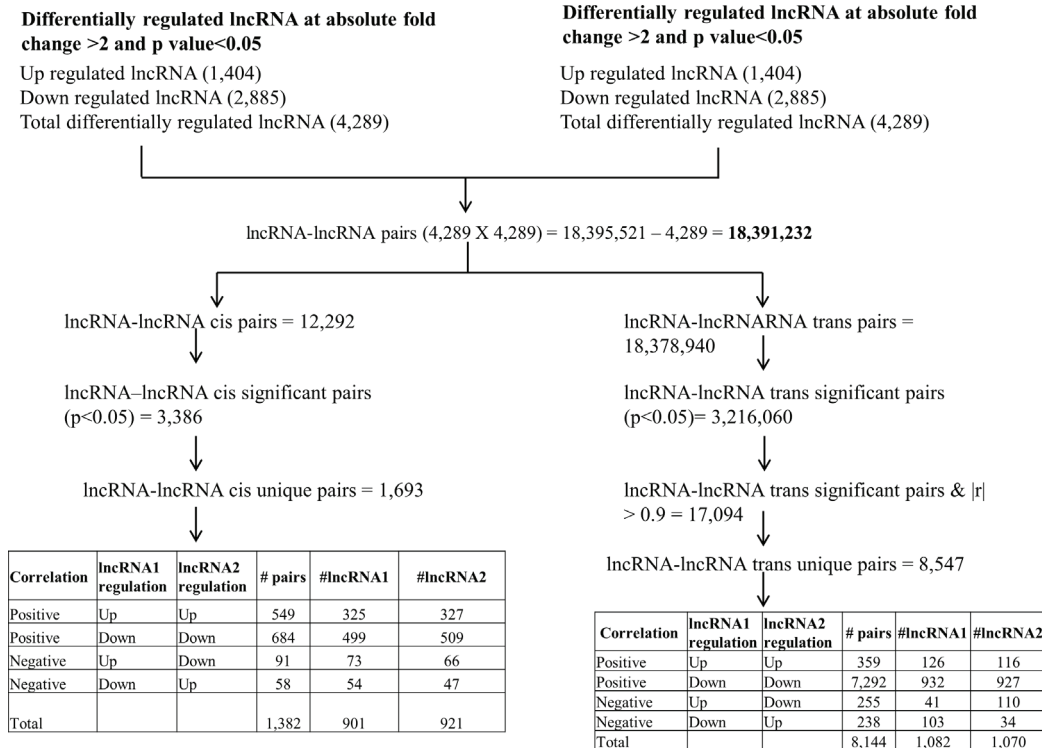

**Supplementary Figure 4: Correlation of lncRNAs with other lncRNAs.** A flow chart showing the strategy used for correlating lncRNAs with other lncRNAs in our cohort.

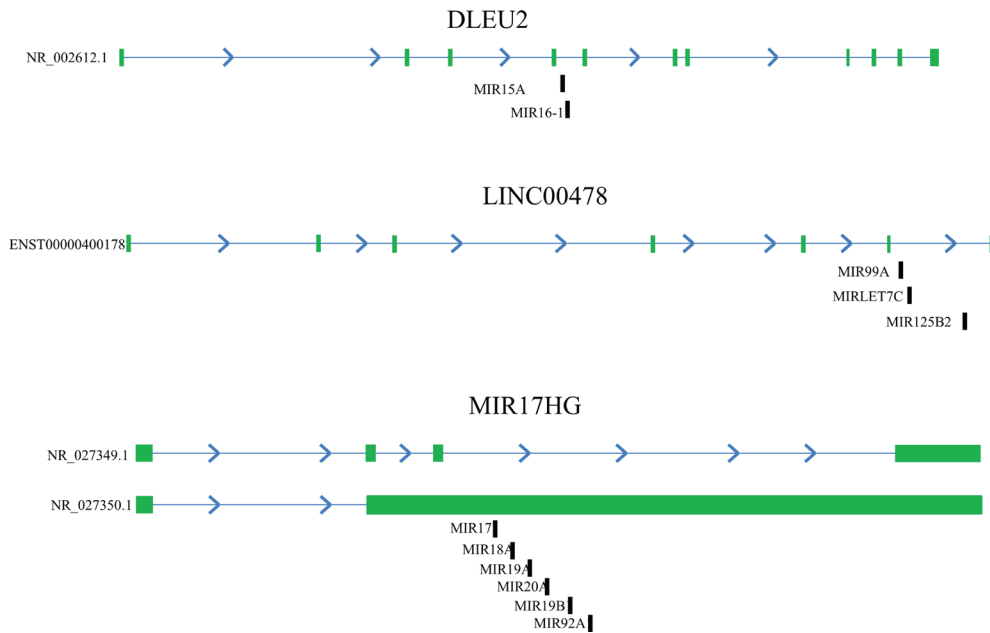

**Supplementary Figure 5: Genomic structure of lncRNAs.** Schematic representation of the genomic locus of DLEU2, LINC00478 and MIR17HG.

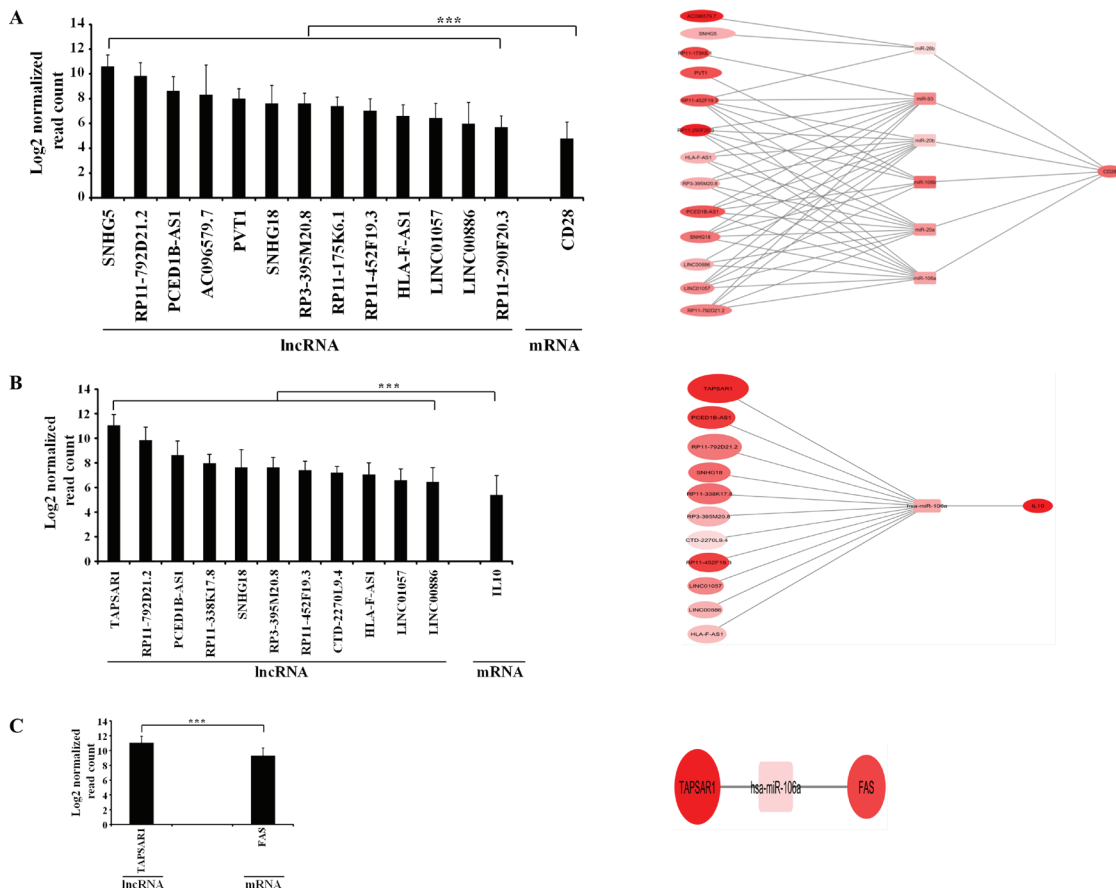

**Supplementary Figure 6: ceRNA network of activation of T and B lymphocytes pathway genes in GBM.** lncRNA-miRNA-mRNA sponge network for CD28 (A), IL10 (B) and FAS (C) in GBM is shown. Bar graph shows the average log<sub>2</sub> abundance of lncRNA and mRNA sponge network molecules in GBM samples with standard deviation. Square node represents miRNA and circle nodes represent lncRNAs and mRNA. The Size of the node (lncRNA and mRNA) is proportional to average abundance of the molecule in GBM samples. Intensity of colour represents the log<sub>2</sub> fold change between GBM samples and control brain samples.

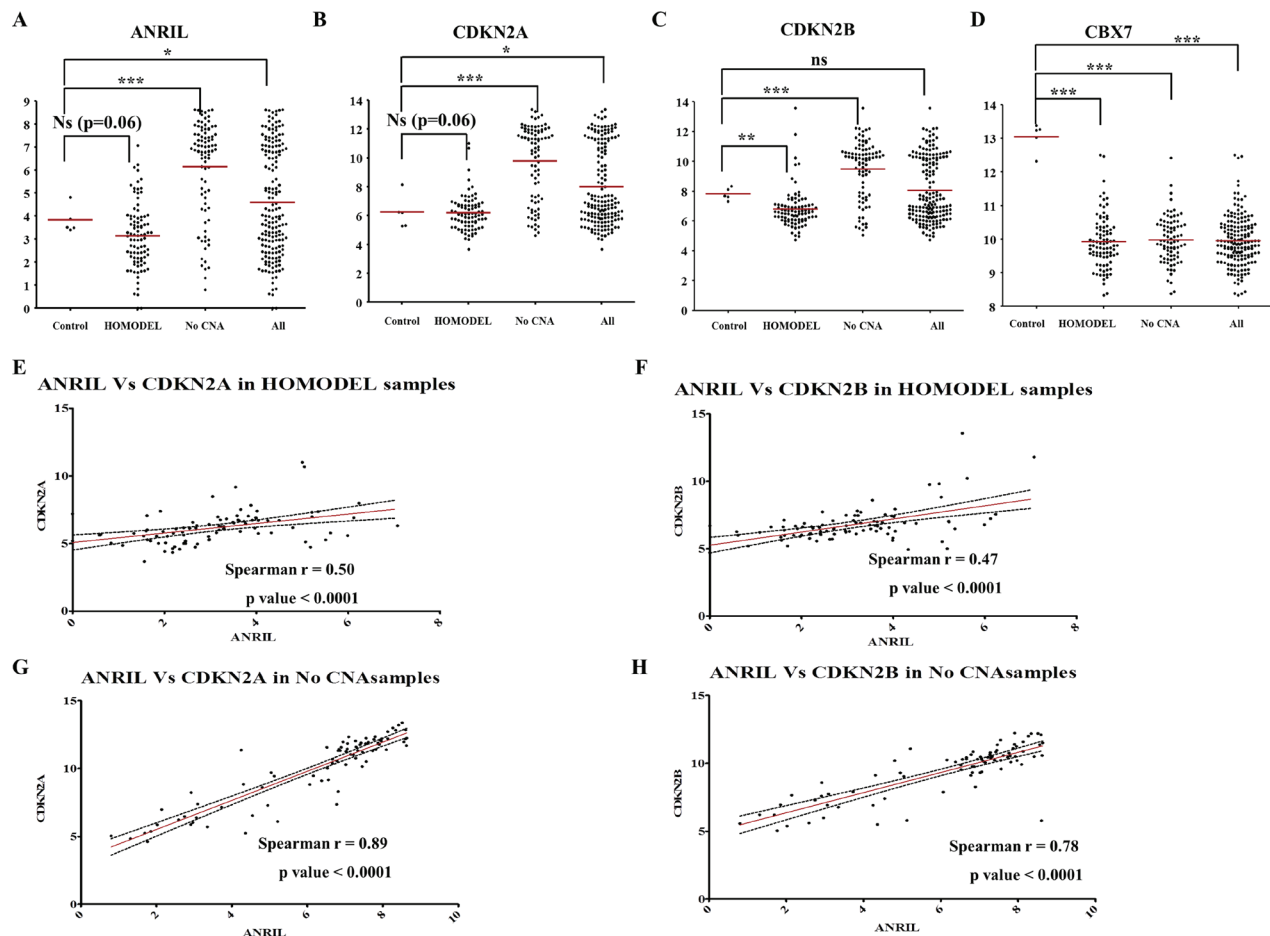

**Supplementary Figure 7: Regulation and correlation of ANRIL.** mRNA expression of ANRIL (A) CDKN2A (B), CDKN2B (C) and CBX7 (D) in control brain ( $n = 5$ ); CDKN2A/2B homozygous deleted samples ( $n = 90$ ); no copy number alteration in CDKN2A/2B locus samples ( $n = 82$ ) and all GBM samples ( $n = 172$ ) from TCGA RNA sequencing cohort. (E) Correlation between ANRIL and CDKN2A in CDKN2A/2B homozygous deleted samples ( $n = 90$ ) in TCGA RNA sequencing cohort. (F) Correlation between ANRIL and CDKN2B in CDKN2A/2B homozygous deleted samples ( $n = 90$ ) in TCGA RNA sequencing cohort. (G) Correlation between ANRIL and CDKN2A in no copy number alteration in CDKN2A/2B samples ( $n = 82$ ) in TCGA RNA sequencing cohort. (H) Correlation between ANRIL and CDKN2A in no copy number alteration in CDKN2A/2B samples ( $n = 82$ ) in TCGA RNA sequencing cohort.

**Supplementary Table 1: List of samples used in this study for microarray analysis**

| S. no. | Sample_Id | "Sample type/Grade " | "#450 K methylation" | <sup>s</sup> GSE79122 | Gender | "Age (years)" |
|--------|-----------|----------------------|----------------------|-----------------------|--------|---------------|
| 1      | G1        | GBM                  | methy                | GSM2086371            | male   | 63            |
| 2      | G2        | GBM                  | methy                | GSM2086372            | male   | 45            |
| 3      | G3        | GBM                  | methy                | GSM2086373            | female | 61            |
| 4      | G4        | GBM                  | methy                | GSM2086396            | male   | 54            |
| 5      | G5        | GBM                  | methy                | GSM2086397            | male   | 51            |
| 6      | G6        | GBM                  | methy                | GSM2086398            | male   | 55            |
| 7      | G7        | GBM                  | methy                | GSM2086400            | male   | 62            |
| 8      | G8        | GBM                  | methy                | GSM2086379            | male   | 20            |
| 9      | G9        | GBM                  | methy                | GSM2086380            | male   | 34            |
| 10     | G10       | GBM                  | methy                | GSM2086384            | male   | 50            |
| 11     | G11       | GBM                  | methy                | GSM2086377            | male   | 50            |
| 12     | G12       | GBM                  | methy                | GSM2086386            | female | 55            |
| 13     | G13       | GBM                  | methy                | GSM2086385            | male   | 50            |
| 14     | G14       | GBM                  | methy                | GSM2086370            | male   | 45            |
| 15     | G15       | GBM                  | methy                | GSM2086374            | male   | 60            |
| 16     | G16       | GBM                  | methy                | GSM2086378            | male   | 65            |
| 17     | G17       | GBM                  | methy                | GSM2086376            | male   | 37            |
| 18     | G18       | GBM                  | methy                | GSM2086383            | male   | 45            |
| 19     | G19       | GBM                  | methy                | GSM2086387            | female | 45            |
| 20     | G20       | GBM                  | methy                | GSM2086388            | femlae | 40            |
| 21     | G21       | GBM                  | methy                | GSM2086366            | male   | 56            |
| 22     | G22       | GBM                  | methy                | GSM2086392            | female | 49            |
| 23     | N1        | Control Brain        | methy                | GSM2086323            | male   | 25            |
| 24     | N2        | Control Brain        | ND                   | NA                    | NA     | NA            |
| 25     | N3        | Control Brain        | ND                   | NA                    | NA     | NA            |
| 26     | N4        | Control Brain        | ND                   | NA                    | NA     | NA            |
| 27     | N5        | Control Brain        | methy                | GSM2086325            | female | 51            |
| 28     | N6        | Control Brain        | methy                | GSM2086326            | female | 33            |
| 29     | N7        | Control Brain        | ND                   | NA                    | NA     | NA            |
| 30     | N8        | Control Brain        | methy                | GSM2086324            | female | 15            |

<sup>#</sup>Integrative functional genomic analysis identifies epigenetically regulated fibromodulin as an essential gene for glioma cell migration. Mondal B, Patil V, Shwetha SD, Sravani K, Hegde AS, Arivazhagan A, Santosh V, Kanduri M, Somasundaram K. *Oncogene*. 2017; 36:71–83.

<sup>s</sup>ID as per geo GSE79122 (<https://www.ncbi.nlm.nih.gov/geo/query/acc.cgi?acc=GSE79122>).

ND- Not done.

NA- Not available.

**Supplementary Table 2: Differentially regulated lncRNAs between GBM vs control brain samples in our cohort.** See Supplementary\_Table\_2

**Supplementary Table 3: Differentially regulated mRNAs between GBM vs control brain samples in our cohort.** See Supplementary\_Table\_3

**Supplementary Table 4: Correlation between lncRNAs and mRNAs in cis.** See Supplementary\_Table\_4

**Supplementary Table 5: Correlation between lncRNAs and mRNAs in trans.** See Supplementary\_Table\_5

**Supplementary Table 6: Enriched gene ontology and pathways in cis.** See Supplementary\_Table\_6

**Supplementary Table 7: Enriched gene ontology and pathways in trans.** See Supplementary\_Table\_7

**Supplementary Table 8: Correlation between lncRNAs and lncRNAs in cis.** See Supplementary\_Table\_8

**Supplementary Table 9: Correlation between lncRNAs and lncRNAs in trans.** See Supplementary\_Table\_9

**Supplementary Table 10: List of lncRNA genes that behave as hosts or parent genes for miRNAs and miRNA families.** See Supplementary\_Table\_10

**Supplementary Table 11: Competing endogenous RNAs (ceRNA) network in GBM (TCGA RNA-Seq).** See Supplementary\_Table\_11

**Supplementary Table 12: List of enriched pathways in competing endogenous RNAs (ceRNA) network in GBM (TCGA RNA sequencing).** See Supplementary\_Table\_12

**Supplementary Table 13: List of lncRNAs correlating with survival in GBM (TCGA RNA-Seq).** See Supplementary\_Table\_13
